# Supplementary material for: Identifying (subsurface) anthropogenic heat sources that influence temperature in the drinking water distribution system
Source: Copernicus journal article supplement (doi:10.5194/dwes-10-83-2017), 2017-09-14
Supplement: Supplementary file 1 [file dwes-10-83-2017-supplement.zip]

Archive with 2 entries (2 files):
- Soil_Temperature_measurements.csv
- dwes-10-83-2017-supplement-title-page.pdf
