# Supplementary material for: Identifying (subsurface) anthropogenic heat sources that influence temperature in the drinking water distribution system
Source: Copernicus journal article supplement (doi:10.5194/dwes-10-83-2017), 2017-09-14
Supplement: Supplementary file 1 [file dwes-10-83-2017-supplement.zip › dwes-10-83-2017-supplement-title-page.pdf]

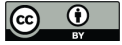

*Supplement of*

## **Identifying (subsurface) anthropogenic heat sources that influence temperature in the drinking water distribution system**

**Claudia M. Agudelo-Vera et al.**

*Correspondence to:* Claudia M. Agudelo-Vera ([claudia.agudelo-vera@kwrwater.nl](mailto:claudia.agudelo-vera@kwrwater.nl))

- [dwes-10-83-2017-supplement-title-page.pdf](#)
- [Soil\\_Temperature\\_measurements.csv](#)

The copyright of individual parts of the supplement might differ from the CC BY 3.0 License.
