# Supplementary material for: Identifying (subsurface) anthropogenic heat sources that influence temperature in the drinking water distribution system
Source: Copernicus journal article supplement (doi:10.5194/dwes-10-83-2017), 2017-09-14
Supplement: Supplementary file 1 [file dwes-10-83-2017-supplement.zip › Soil_Temperature_measurements.csv]

;Soil Temperature Measurements at 1m depth
;Maximum daily temperature in �C
;42 temperature sensors
;83 days
DOY	1	2	3	4	5	6	7	8	9	10	11	12	13	14	15	16	17	18	19	20	21	22	23	24	25	26	27	28	29	30	31	32	33	34	35	36	37	38	39	40	41	42
200	24.1	19.3	24.2	21.3	23.1	18.8	21.1	22.2	17.1	23.4	20.4	18.5	22.8	19.7	22	21.9	19.5	19.1	19.2	15.6	19.5	21.8	22.2	20.5	21.8	19.4	22	20.4	19.5	20	19.2	17.4	20.9	20.3	21.3	22.2	16.6	20.5	20.7	18.2	22	19.2
201	25	19.8	25	21.9	23.7	19.1	21.6	23	17.4	24	20.8	18.7	23.4	20	22.4	22.3	19.9	19.3	19.5	15.7	19.8	22.4	22.9	21.1	22.3	19.7	22.3	20.9	19.8	20.6	19.5	17.7	21.5	20.5	21.9	22.8	16.7	20.9	21.3	18.4	22.9	19.6
202	25.6	20.1	25.6	22.5	24.3	19.4	22.2	23.7	17.6	24.7	21.1	18.9	24.1	20.4	22.8	22.8	20.4	19.7	19.8	16	20.1	23	23.5	21.6	22.9	19.9	22.8	21.5	20.2	21	19.8	18.1	22	20.9	22.6	23.2	16.9	21.3	21.7	18.7	23.6	20.2
203	26.1	20.3	25.9	22.9	24.7	19.6	22.5	24.1	17.9	25	21.4	19	24.5	20.6	23.1	23.1	20.7	19.9	20.1	16.1	20.3	23.3	24	22.1	23.1	20.2	22.9	21.8	20.4	21.5	20	18.3	22.4	21.2	23	23.6	17	21.6	22	19	23.9	20.4
204	26.3	20.6	26	23.1	24.9	19.9	22.7	24.3	18	25.3	21.6	19.2	24.6	20.9	23.3	23.2	20.9	20	20.3	16.3	20.7	23.3	24.2	22.2	23.2	20.3	23	22	20.6	21.5	20.2	18.4	22.5	21.4	23.2	23.8	17.2	21.8	22.2	19.2	24.1	20.6
205	26.4	20.9	26	23.2	24.9	20	22.9	24.4	18.1	25.4	21.8	19.3	24.7	21	23.5	23.3	20.9	20.1	20.4	16.5	20.9	23	24.4	22.4	23.1	20.5	23.1	22.2	20.8	21.6	20.3	18.5	22.7	21.6	23.3	24	17.4	22	22.4	19.3	24.1	20.7
206	26.5	20.9	26	23.3	25.1	20.2	23	24.5	18.2	25.6	22	19.4	24.9	21.2	23.7	23.5	21	20.2	20.6	16.6	21.2	23.1	24.7	22.6	23	20.7	23.2	22.3	20.9	21.8	20.4	18.6	22.7	21.8	23.5	24.1	17.4	22.2	22.6	19.4	24.2	20.8
207	26.5	20.9	26	23.3	25.1	20.2	23	24.5	18.2	25.6	22	19.4	24.9	21.2	23.7	23.4	21	20.2	20.7	16.7	21.2	23.1	24.7	22.6	23	20.7	23.2	22.3	20.9	21.8	20.4	18.6	22.8	21.8	23.4	24.1	17.5	22.2	22.6	19.4	24.2	20.8
208	26.2	20.8	25.6	23.1	24.9	20.2	22.9	24.2	18.2	25.4	22	19.3	24.6	21.2	23.7	23.3	21	20.2	20.8	16.7	21.3	22.9	24.5	22.5	22.9	20.6	23.1	22.2	20.9	21.7	20.4	18.6	22.5	21.8	23.2	24	17.5	22.2	22.3	19.4	23.8	20.6
209	25.9	20.7	25.3	23	24.7	20.2	22.7	24	18.1	25.2	22	19.3	24.4	21.1	23.7	23.1	20.9	20.1	20.8	16.8	21.2	22.8	24.2	22.2	22.7	20.6	23	22.1	20.9	21.5	20.4	18.5	22.3	21.7	23	24	17.5	22.1	22.1	19.4	23.6	20.5
210	25.3	20.7	24.8	22.7	24.3	20.1	22.4	23.5	18	24.7	21.9	19.2	24.1	20.9	23.6	22.7	20.8	20.1	20.8	16.8	21.1	22.4	23.8	21.9	22.4	20.4	22.9	21.8	20.7	21.2	20.3	18.4	22	21.5	22.6	23.7	17.5	21.9	21.6	19.4	23.1	20.3
211	24.7	20.6	24.4	22.4	24	20	22.2	22.9	17.9	24.3	21.8	19.2	23.8	20.7	23.5	22.4	20.6	20	20.8	16.8	21.1	22.2	23.5	21.6	22.2	20.3	22.8	21.5	20.6	20.9	20.3	18.3	21.6	21.3	22.2	23.5	17.5	21.6	21.3	19.4	22.7	20.2
212	24.3	20.8	24.1	22.1	23.6	20	21.8	22.5	17.7	23.9	21.7	19.1	23.4	20.5	23.4	22.2	20.4	19.9	20.7	16.8	21	21.9	23.2	21.4	22.1	20.3	22.7	21.3	20.4	20.7	20.3	18.2	21.4	21.1	21.8	23.2	17.5	21.5	21	19.4	22.3	20.1
213	24	20.7	24	21.8	23.3	19.9	21.6	22.2	17.6	23.5	21.5	19	23.2	20.3	23.2	22	20.3	19.8	20.7	16.8	20.9	21.6	22.9	21.1	21.9	20.2	22.6	21.1	20.3	20.5	20.2	18.1	21.2	20.9	21.6	23	17.4	21.3	20.7	19.3	22.1	19.9
214	24	20.4	23.9	21.7	23.2	19.8	21.5	22	17.5	23.5	21.5	19	23.1	20.3	23.1	21.9	20.2	19.7	20.6	16.7	20.8	21.5	22.7	21	21.9	20.1	22.5	21	20.3	20.4	20.1	18	21.2	20.9	21.5	22.9	17.4	21.1	20.8	19.2	21.9	19.7
215	24	20.1	23.7	21.7	23.2	19.7	21.5	22	17.5	23.4	21.5	18.9	23	20.2	23	21.9	20.2	19.6	20.5	16.7	20.6	21.4	22.5	21	21.9	19.9	22.4	21	20.2	20.4	20	17.9	21.2	20.9	21.5	22.8	17.4	21.1	20.7	19.1	21.7	19.3
216	23.5	20.1	23.4	21.5	22.9	19.6	21.2	21.6	17.4	22.9	21.4	18.9	22.6	20	22.9	21.5	20	19.4	20.4	16.7	20.5	21.1	22.2	20.7	21.7	19.8	22.3	20.9	20	20.2	19.9	17.8	20.9	20.7	21.3	22.5	17.4	20.9	20.4	19	21.4	19.2
217	23.1	19.9	23.1	21.2	22.6	19.5	21	21.3	17.3	22.6	21.3	18.8	22.4	19.8	22.8	21.4	19.8	19.3	20.4	16.7	20.4	20.9	21.9	20.5	21.5	19.7	22.2	20.6	19.9	20	19.8	17.7	20.7	20.5	21	22.3	17.4	20.8	20.2	18.9	21.1	19.2
218	23.3	19.8	23.5	21.2	22.6	19.4	21	21.4	17.3	22.6	21.1	18.8	22.5	19.8	22.7	21.3	19.8	19.3	20.3	16.7	20.3	20.9	21.9	20.4	21.5	19.7	22.2	20.5	19.8	20	19.8	17.7	20.8	20.4	21.1	22.2	17.4	20.7	20.2	18.8	21.3	19.2
219	23.6	19.9	23.8	21.5	22.9	19.5	21.2	21.7	17.4	22.9	21.2	18.8	22.6	19.8	22.8	21.3	20	19.2	20.3	16.7	20.3	21	22.1	20.6	21.7	19.6	22.2	20.6	19.8	20.2	19.8	17.7	20.9	20.5	21.4	22.2	17.3	20.7	20.4	18.8	21.5	19.2
220	23.6	19.9	23.8	21.5	22.9	19.5	21.2	21.7	17.4	22.9	21.2	18.8	22.6	19.8	22.8	21.3	20	19.2	20.3	16.6	20.3	21.1	22.2	20.6	21.7	19.6	22.2	20.6	19.8	20.2	19.7	17.7	20.9	20.6	21.4	22.2	17.4	20.8	20.4	18.7	21.5	19.2
221	23.6	19.9	23.7	21.5	22.9	19.5	21.2	21.7	17.4	22.9	21.2	18.8	22.6	19.8	22.8	21.3	20	19.2	20.3	16.6	20.3	21.1	22.2	20.6	21.7	19.6	22.3	20.6	19.9	20.3	19.7	17.7	20.9	20.6	21.5	22.2	17.4	20.8	20.4	18.7	21.5	19.1
222	23.6	19.9	23.7	21.5	22.9	19.5	21.2	21.7	17.4	22.9	21.2	18.8	22.6	19.8	22.8	21.3	20	19.2	20.3	16.6	20.2	21.1	22.2	20.6	21.6	19.5	22.3	20.6	19.9	20.2	19.7	17.7	20.9	20.6	21.5	22.2	17.4	20.8	20.3	18.7	21.5	19
223	23.6	19.8	23.7	21.5	22.9	19.5	21.1	21.6	17.3	22.9	21.1	18.7	22.5	19.6	22.8	21.2	20	19.1	20.2	16.6	20.1	21.1	22.1	20.4	21.6	19.3	22.2	20.5	19.8	20.2	19.6	17.5	20.9	20.6	21.5	22	17.4	20.7	20.1	18.6	21.4	18.6
224	23.5	19.5	23.1	21.4	22.7	19.4	21	21.5	17.2	22.7	21	18.6	22.3	19.4	22.6	20.9	19.9	18.9	20.1	16.4	19.9	20.9	22	20.2	21.5	19	22	20.3	19.6	20	19.4	17.4	20.7	20.5	21.4	21.8	17.3	20.5	19.8	18.4	21.1	18
225	22.9	19.5	22.9	21	22.2	19.2	20.7	21	17	22.1	20.8	18.4	21.8	19.1	22.3	20.5	19.7	18.6	19.9	16.2	19.8	20.5	21.5	19.8	21.3	18.7	21.8	20.1	19.3	19.8	19.2	17.1	20.3	20.3	20.9	21.4	17.2	20.2	19.4	18.1	20.6	18.1
226	22.8	19.5	23	20.9	22.1	19.2	20.5	20.9	16.9	22	20.7	18.4	21.7	19.2	22.2	20.3	19.6	18.7	19.8	16.2	19.8	20.3	21.4	19.8	21.1	18.8	21.8	19.9	19.3	19.6	19.2	17.3	20.2	20.1	20.6	21.4	17.2	20	19.5	18.1	20.5	18.3
227	23	19.6	23.3	21	22.2	19.2	20.7	21	17	22.2	20.7	18.4	21.8	19.3	22.2	20.6	19.6	18.8	19.8	16.2	19.8	20.5	21.5	19.9	21.2	19	21.9	20	19.4	19.8	19.2	17.4	20.3	20.2	20.8	21.5	17.1	20.1	19.7	18.3	20.7	18.5
228	23.4	19.6	23.5	21.2	22.3	19.3	20.9	21.3	17	22.4	20.8	18.4	22	19.4	22.2	20.7	19.8	18.9	19.8	16.2	19.8	20.6	21.6	20.1	21.3	19	22	20.2	19.5	19.8	19.3	17.4	20.5	20.3	21	21.5	17.2	20.2	19.9	18.3	20.9	18.6
229	23.7	19.7	23.9	21.5	22.5	19.4	21	21.7	17	22.6	20.9	18.4	22.2	19.4	22.3	20.7	19.9	18.9	19.8	16.2	19.9	20.8	21.8	20.3	21.4	18.9	22	20.3	19.5	20	19.3	17.4	20.8	20.4	21.4	21.6	17.2	20.3	20.2	18.3	21.2	18.6
230	24.1	20.4	24.2	21.8	22.7	19.4	21.3	22.2	17	22.9	21	18.4	22.4	19.4	22.5	20.7	20.1	18.8	19.9	16.2	19.9	20.9	22.1	20.7	21.5	18.9	22.1	20.5	19.6	20.3	19.2	17.4	21	20.6	21.7	21.7	17.2	20.5	20.4	18.3	21.5	18.6
231	24.6	20	24.7	22.2	22.9	19.4	21.5	22.6	17.1	23.1	21.1	18.4	22.6	19.4	22.7	20.6	20.3	18.8	20	16.2	20	21.1	22.4	21	21.6	18.8	22.2	20.8	19.7	20.6	19.2	17.4	21.3	20.9	22.2	21.8	17.3	20.6	20.7	18.2	21.8	18.6
232	24.6	19.8	24.7	22.2	23	19.4	21.5	22.7	17.1	23.1	21.2	18.4	22.7	19.4	22.8	20.4	20.4	18.9	20.1	16.2	20.1	21.1	22.5	21.1	21.6	18.8	22.2	20.9	19.8	20.6	19.2	17.4	21.4	20.9	22.2	21.8	17.3	20.7	20.7	18.2	21.9	18.6
233	24.5	19.8	24.6	22.3	22.9	19.5	21.5	22.6	17.2	23.1	21.2	18.5	22.7	19.5	22.9	20.4	20.3	18.9	20.1	16.3	20.1	21.1	22.5	21.1	21.6	18.8	22.3	20.9	19.8	20.6	19.3	17.4	21.3	20.9	22.2	21.9	17.3	20.7	20.7	18.3	21.9	18.6
234	24.3	19.6	24.1	22.2	22.9	19.5	21.5	22.5	17.1	23	21.2	18.5	22.6	19.5	22.9	20.4	20.3	18.9	20.1	16.3	20.1	21.1	22.5	21	21.6	18.8	22.2	20.9	19.8	20.6	19.3	17.4	21.2	20.9	22	21.8	17.3	20.7	20.6	18.3	21.8	18.6
235	23.9	19.6	23.7	22	22.7	19.4	21.3	22.2	17.1	22.8	21.1	18.4	22.4	19.5	22.8	20.4	20.2	18.9	20.1	16.3	20.1	20.9	22.2	20.8	21.5	18.8	22.2	20.7	19.7	20.3	19.3	17.4	20.9	20.7	21.6	21.7	17.3	20.6	20.3	18.3	21.3	18.5
236	24	19.8	24	22	22.7	19.5	21.2	22.2	17.2	22.9	21.1	18.5	22.5	19.6	22.6	20.3	20.3	19	20	16.4	20.2	20.9	22.3	20.9	21.7	18.9	22.2	20.8	19.7	20.3	19.4	17.4	20.9	20.6	21.7	21.8	17.4	20.5	20.5	18.3	21.4	18.6
237	24.8	20.9	24.9	22.5	23.2	19.7	21.6	22.9	17.4	23.5	21.4	18.8	23.2	19.8	22.9	20.4	20.7	19.2	20.2	16.5	20.4	21.4	23	21.5	22	19.1	22.5	21.2	19.9	20.7	19.6	17.7	21.4	20.9	22.4	22.2	17.4	20.8	21.1	18.5	22	19
238	25.7	20.5	25.8	23.2	23.7	20	22.2	23.7	17.7	24	21.7	19	23.8	20.3	23.3	20.6	21.2	19.5	20.4	16.7	20.7	22	23.7	22.2	22.4	19.3	22.9	21.7	20.3	21.3	19.9	18	22	21.5	23.1	22.7	17.6	21.2	21.8	18.6	22.7	19.4
239	26.2	20.5	26.2	23.6	24.1	20.1	22.7	24.2	18	24.6	22.1	19.1	24.3	20.5	23.6	20.7	21.5	19.8	20.7	17	21	22.4	24.2	22.6	22.7	19.6	23.1	22.2	20.5	21.6	20.1	18.2	22.3	21.9	23.6	23	17.8	21.5	22.2	18.8	23.1	19.7
240	26.6	20.7	26.4	23.9	24.3	20.3	22.9	24.6	18	24.8	22.3	19.3	24.5	20.7	23.8	20.8	21.8	19.9	20.9	17.2	21.2	22.6	24.5	22.9	22.8	19.8	23.3	22.4	20.7	21.9	20.3	18.3	22.6	22.2	23.9	23.2	17.9	21.8	22.4	19	23.2	19.9
241	26.6	20.9	26.4	24	24.3	20.4	23	24.7	18.1	24.9	22.4	19.3	24.6	20.8	23.9	20.9	21.9	20.1	21	17.3	21.3	22.7	24.6	22.9	22.8	19.9	23.3	22.5	20.9	22	20.4	18.4	22.7	22.2	23.9	23.2	18	22	22.4	19.1	23.3	20
242	26.4	20.9	26.2	24	24.3	20.4	23	24.6	18.1	24.8	22.4	19.3	24.5	20.8	23.9	21	21.8	20.1	21.1	17.4	21.3	22.6	24.6	22.9	22.7	19.9	23.3	22.5	20.9	21.9	20.4	18.4	22.6	22.2	23.9	23.2	18.1	22	22.2	19.2	23.1	20
243	26.2	20.7	26	23.8	24	20.4	22.9	24.3	18	24.7	22.4	19.3	24.3	20.8	23.8	21	21.7	20	21.1	17.4	21.3	22.4	24.4	22.7	22.7	19.8	23.2	22.4	20.8	21.7	20.3	18.3	22.4	22.2	23.6	23	18.1	22	22.1	19.1	22.8	19.8
244	26.2	20.6	26.1	23.8	23.9	20.4	22.9	24.3	18	24.5	22.3	19.2	24.3	20.6	23.7	20.8	21.7	19.9	21.1	17.3	21.2	22.3	24.4	22.6	22.6	19.7	23.1	22.3	20.7	21.6	20.3	18.1	22.4	22.1	23.5	22.9	18.1	21.9	21.9	19	22.6	19.7
245	26.2	20.6	26.1	23.8	23.9	20.4	22.9	24.2	18	24.5	22.3	19.1	24.3	20.5	23.6	20.5	21.7	19.8	21.1	17.3	21.2	22.2	24.4	22.6	22.5	19.6	23.1	22.3	20.7	21.6	20.2	18	22.3	22	23.5	22.9	18.1	21.8	21.8	18.9	22.6	19.6
246	26	20.5	25.9	23.8	23.8	20.4	22.8	24.1	17.9	24.3	22.3	19	24.1	20.4	23.5	20.5	21.7	19.8	21.1	17.3	21.1	22.2	24.3	22.5	22.5	19.6	23.1	22.2	20.6	21.5	20.2	18	22.3	22	23.4	22.9	18.1	21.8	21.8	18.9	22.5	19.5
247	25.6	20.5	25.4	23.5	23.6	20.3	22.6	23.8	17.8	24	22.2	19	23.9	20.3	23.2	20.5	21.5	19.8	21	17.2	21	22	24	22.3	22.3	19.6	23	22.1	20.6	21.4	20.2	18	22.1	21.9	23.1	22.8	18	21.7	21.5	18.9	22.2	19.5
248	25.3	20.4	25.2	23.3	23.5	20.3	22.5	23.5	17.7	24	22.2	19	23.8	20.3	23	20.4	21.3	19.8	21	17.2	21	21.8	23.8	22.1	22.2	19.6	22.9	21.9	20.5	21.2	20.1	18	21.9	21.7	22.9	22.7	18	21.5	21.3	18.9	22.1	19.4
249	24.9	20.4	25	23	23.2	20.3	22.3	23	17.7	23.6	22.1	18.9	23.6	20.1	22.9	20.4	21	19.7	20.9	17.2	20.9	21.5	23.5	21.8	22.1	19.5	22.9	21.6	20.3	21	20.1	18	21.6	21.5	22.5	22.5	18	21.4	20.9	18.9	21.7	19.3
250	24.8	20.4	25	22.9	23.1	20.3	22.3	22.9	17.6	23.5	22	18.9	23.6	20.1	22.8	20.3	21	19.6	20.9	17.1	20.9	21.4	23.5	21.7	22	19.5	22.9	21.5	20.3	20.9	20	18	21.6	21.4	22.4	22.4	18	21.2	20.8	18.8	21.6	19.2
251	25	20.4	25.3	22.9	23.1	20.3	22.3	22.9	17.6	23.6	22.1	18.9	23.7	20.1	22.8	20.3	21.1	19.7	20.9	17.2	20.8	21.5	23.5	21.8	22	19.5	22.9	21.5	20.3	20.8	20	18	21.7	21.5	22.5	22.4	18	21.2	20.9	18.8	21.7	19.2
252	25.3	20.6	25.6	23.2	23.2	20.4	22.5	23.2	17.7	23.7	22.2	19	23.8	20.2	22.9	20.3	21.3	19.8	20.9	17.2	20.9	21.6	23.7	22	22.1	19.5	23	21.7	20.3	20.9	20.1	18	21.9	21.6	22.6	22.5	18	21.3	21.1	18.8	21.9	19.3
253	25.4	20.6	25.7	23.3	23.2	20.5	22.6	23.3	17.8	23.8	22.3	19	23.9	20.2	22.9	20.2	21.4	19.8	20.9	17.3	20.9	21.6	23.9	22	22.1	19.5	23	21.7	20.4	20.9	20.1	18	22	21.7	22.7	22.5	18	21.3	21.2	18.8	22	19.2
254	25.4	20.6	25.7	23.4	23.3	20.5	22.7	23.4	17.8	23.8	22.3	19	24	20.2	22.8	20	21.5	19.8	20.9	17.3	20.9	21.6	24	22.1	22.1	19.5	23	21.8	20.4	20.9	20.1	18	22.1	21.7	22.8	22.6	18.1	21.4	21.3	18.8	22	19.2
255	25.4	20.7	25.7	23.4	23.3	20.5	22.7	23.4	17.8	23.8	22.4	19	24	20.2	22.8	20	21.5	19.8	20.9	17.3	20.9	21.6	24	22.1	22.2	19.5	23	21.8	20.4	20.9	20.1	18	22.1	21.7	22.8	22.6	18.1	21.4	21.3	18.8	22.1	19.3
256	25.5	20.7	25.9	23.5	23.4	20.5	22.8	23.5	17.9	24	22.5	19.1	24.2	20.3	22.8	20.1	21.5	19.9	21	17.4	21	21.8	24.1	22.2	22.2	19.6	23.1	22	20.5	20.9	20.2	18.1	22.2	21.8	22.9	22.8	18.1	21.5	21.5	18.9	22.2	19.5
257	26	20.9	26.4	23.7	23.5	20.7	23	23.9	18	24.3	22.7	19.1	24.5	20.4	22.9	20.3	21.7	20.1	21.1	17.4	21.1	22.1	24.5	22.6	22.4	19.8	23.4	22.2	20.7	21.1	20.3	18.3	22.4	22	23.2	22.9	18.2	21.6	21.8	19	22.5	19.7
258	26.4	20.9	26.8	24	23.7	20.8	23.2	24.3	18.1	24.6	22.9	19.2	24.9	20.6	22.9	20.3	22	20.3	21.3	17.6	21.3	22.3	24.9	22.9	22.6	20	23.5	22.6	20.9	21.3	20.5	18.4	22.7	22.2	23.5	23.2	18.3	21.9	22.2	19.2	22.8	19.9
259	26.6	21.1	27	24.2	23.8	20.9	23.3	24.5	18.2	24.7	23.1	19.3	25	20.8	23.1	20.4	22.2	20.4	21.5	17.7	21.5	22.5	25	23.1	22.7	20.1	23.6	22.8	21	21.4	20.7	18.5	22.8	22.3	23.7	23.3	18.5	22.2	22.3	19.2	22.9	20
260	26.6	21.1	26.9	24.2	23.8	21	23.3	24.5	18.2	24.7	23.2	19.3	25	20.8	23.1	20.4	22.2	20.4	21.5	17.8	21.5	22.5	25	23.1	22.7	20.1	23.6	22.8	21	21.4	20.7	18.5	22.8	22.3	23.6	23.3	18.5	22.2	22.3	19.2	22.9	20
261	26.2	21	26.4	24	23.6	20.9	23	24.1	18.2	24.5	23.2	19.3	24.7	20.7	23	20.3	22	20.4	21.5	17.8	21.5	22.3	24.7	22.9	22.6	20.1	23.5	22.7	20.9	21.2	20.7	18.4	22.6	22.2	23.4	23.1	18.5	22.2	22.1	19.2	22.5	19.9
262	25.9	20.9	26.1	23.9	23.4	20.8	22.9	23.8	18.1	24.2	23.1	19.2	24.5	20.6	22.9	20.3	21.8	20.3	21.4	17.8	21.4	22.2	24.3	22.6	22.4	19.9	23.4	22.5	20.9	21	20.6	18.3	22.3	22.1	23	23	18.5	22	21.8	19.2	22.2	19.8
263	25.6	20.9	25.9	23.6	23.2	20.8	22.7	23.6	18	24	23	19.2	24.3	20.4	22.9	20.3	21.7	20.2	21.3	17.8	21.3	21.9	24	22.4	22.2	19.8	23.2	22.3	20.8	20.9	20.5	18.2	22.2	21.9	22.9	22.8	18.5	21.8	21.5	19.2	21.9	19.6
264	25.3	20.7	25.5	23.4	22.9	20.7	22.4	23.2	17.8	23.6	22.9	19	23.9	20.3	22.7	20.3	21.5	20.1	21.2	17.7	21.1	21.6	23.6	22.2	22	19.7	23	22.1	20.7	20.6	20.3	18.1	21.8	21.7	22.6	22.5	18.4	21.6	21.2	19	21.5	19.4
265	25	20.7	25.4	23.1	22.7	20.6	22.2	22.9	17.6	23.4	22.8	18.9	23.7	20.1	22.6	20.3	21.3	19.9	21.1	17.5	20.9	21.5	23.3	21.9	21.8	19.6	22.9	21.9	20.5	20.5	20.3	18	21.6	21.5	22.3	22.3	18.4	21.4	20.9	18.9	21.3	19.3
266	24.7	20.6	25.2	22.9	22.5	20.5	22.1	22.7	17.5	23.2	22.7	18.8	23.5	20	22.5	20.2	21.1	19.8	20.9	17.4	20.8	21.2	23	21.7	21.7	19.5	22.9	21.7	20.4	20.3	20.1	17.9	21.5	21.4	22.1	22.2	18.3	21.2	20.6	18.8	21.1	19.2
267	24.5	20.4	25	22.8	22.3	20.4	21.9	22.4	17.4	22.9	22.6	18.8	23.3	19.8	22.4	20.1	20.9	19.8	20.9	17.3	20.6	20.9	22.8	21.5	21.6	19.4	22.8	21.5	20.3	20.3	20	17.9	21.3	21.2	21.8	22	18.2	20.9	20.4	18.8	20.9	19
268	24.4	20.4	24.9	22.6	22.1	20.3	21.7	22.2	17.4	22.8	22.5	18.7	23.2	19.7	22.4	19.9	20.8	19.6	20.7	17.2	20.5	20.8	22.6	21.2	21.5	19.2	22.7	21.3	20.2	20.1	19.9	17.7	21.2	21.1	21.6	21.7	18.1	20.8	20.3	18.6	20.8	18.7
269	24.3	20.3	24.9	22.5	21.8	20.2	21.5	22.2	17.3	22.6	22.3	18.6	23	19.4	22.3	19.5	20.7	19.5	20.5	17.1	20.3	20.6	22.5	21.1	21.5	19	22.6	21.2	20.1	20	19.8	17.5	21.1	21	21.6	21.5	18	20.7	20.2	18.4	20.6	18.5
270	24.1	20.2	24.7	22.4	21.6	20.1	21.4	22	17.2	22.3	22.2	18.4	22.8	19.2	22.2	19.3	20.6	19.4	20.4	17	20.3	20.4	22.3	20.9	21.4	18.8	22.5	21	20	19.9	19.7	17.4	20.9	20.9	21.5	21.4	18	20.5	19.9	18.3	20.5	18.4
271	23.7	20	24.4	22.1	21.4	20	21.1	21.6	17.1	22	22.2	18.3	22.5	19.1	22.1	19.2	20.3	19.2	20.3	16.9	20.1	20.2	22	20.6	21.2	18.6	22.4	20.9	19.8	19.8	19.6	17.4	20.7	20.8	21.2	21.2	18	20.3	19.7	18.2	20.3	18.3
272	23.5	19.9	24.2	21.9	21.1	19.9	20.9	21.4	17	21.8	22	18.2	22.4	18.8	22.1	19.1	20.2	19.2	20.2	16.8	19.9	20	21.7	20.4	21.1	18.5	22.3	20.7	19.8	19.7	19.4	17.3	20.6	20.6	21.1	21.1	17.9	20.2	19.6	18	20.2	18.1
273	23.5	19.8	24.1	21.9	21.1	19.9	20.9	21.4	17	21.7	21.9	18.2	22.4	18.8	22.1	19.1	20.2	19.2	20.1	16.7	19.9	20	21.6	20.3	21	18.5	22.3	20.6	19.7	19.7	19.4	17.3	20.6	20.5	21.1	21	17.9	20.1	19.6	18	20.2	18
274	23.1	19.8	23.8	21.6	20.9	19.8	20.6	21	16.9	21.4	21.8	18.2	22.1	18.7	22	19.1	20	19.1	20	16.7	19.8	19.8	21.4	20.1	20.9	18.4	22.2	20.5	19.6	19.6	19.3	17.2	20.3	20.3	20.9	20.9	17.8	20	19.3	18	20	18
275	22.8	19.6	23.5	21.5	20.6	19.6	20.4	20.7	16.8	21.1	21.7	18.1	21.8	18.6	21.8	19	19.8	19	19.9	16.7	19.7	19.7	21.1	19.8	20.9	18.3	22.1	20.3	19.5	19.4	19.2	17.1	20.1	20.2	20.6	20.8	17.8	19.9	19.2	17.9	19.8	17.7
276	22.5	19.3	23	21.2	20.3	19.5	20.2	20.3	16.7	20.9	21.5	17.9	21.5	18.5	21.6	18.9	19.7	18.8	19.7	16.6	19.5	19.5	20.9	19.6	20.7	18.1	21.9	20.1	19.3	19.2	19.1	16.9	19.9	20	20.3	20.6	17.7	19.8	19.1	17.8	19.6	17.3
277	22	19.1	22.6	20.8	19.9	19.3	19.8	19.8	16.5	20.3	21.3	17.8	21.1	18.2	21.3	18.7	19.3	18.5	19.5	16.4	18.7	19.1	20.4	18.9	20.5	17.9	21.6	19.8	19.1	18.9	18.9	16.7	19.5	19.8	20	20.3	17.6	19.5	18.6	17.6	19.1	17
278	21.6	18.9	22.4	20.4	19.7	19	19.5	19.4	16.3	20	21	17.6	20.7	18	21	18.5	19.1	18.2	19.3	16.1	18.6	18.7	20	18.5	20.3	17.6	21.5	19.5	18.8	18.7	18.7	16.6	19.2	19.5	19.7	20	17.5	19.2	18.3	17.4	18.8	17
279	21.3	18.7	22.2	20.2	19.3	18.8	19.2	19.1	16	19.6	20.8	17.6	20.4	17.7	20.8	18.3	18.8	18	19.2	16	18.4	18.5	19.7	18.2	20.2	17.4	21.3	19.2	18.6	18.5	18.6	16.4	19	19.3	19.3	19.7	17.4	19	18	17.3	18.5	17
280	21	18.5	22.1	19.9	18.9	18.5	19	18.7	15.8	19.2	20.4	17.3	20	17.4	20.3	18	18.6	17.8	18.9	15.8	18.2	18	19.3	18	19.9	17	21	19	18.3	18.2	18.3	16	18.7	19.2	19	19.2	17.3	18.7	17.7	17	18.1	17
281	20.8	18.3	21.8	19.7	18.5	18.2	18.7	18.5	15.4	18.8	20.1	17	19.7	16.9	19.9	17.5	18.3	17.5	18.6	15.5	18	17.7	18.9	17.6	19.6	16.6	20.8	18.7	18	18	18	15.8	18.5	19	18.7	18.8	17.1	18.5	17.4	16.7	17.8	17.1
282	20.5	18	21.6	19.4	18.3	18	18.6	18.3	15.3	18.6	19.8	16.9	19.5	16.7	19.6	17.4	18.1	17.4	18.4	15.3	17.8	17.4	18.6	17.4	19.4	16.5	20.7	18.6	17.9	17.8	17.8	15.6	18.3	18.8	18.5	18.6	16.9	18.2	17.2	16.5	17.6	17.2
